# Supplementary material for: A novel elicitor protein phosphopentomutase from Bacillus velezensis LJ02 enhances tomato resistance to Botrytis cinerea
Source: Frontiers journal article supplement (doi:10.3389/fpls.2022.1064589), 2022-11-29
Supplement: Data_Sheet_1.docx [file Data_Sheet_1.docx]

Supplementary Material

# Supplementary Figure and Tables

## Supplementary Figure


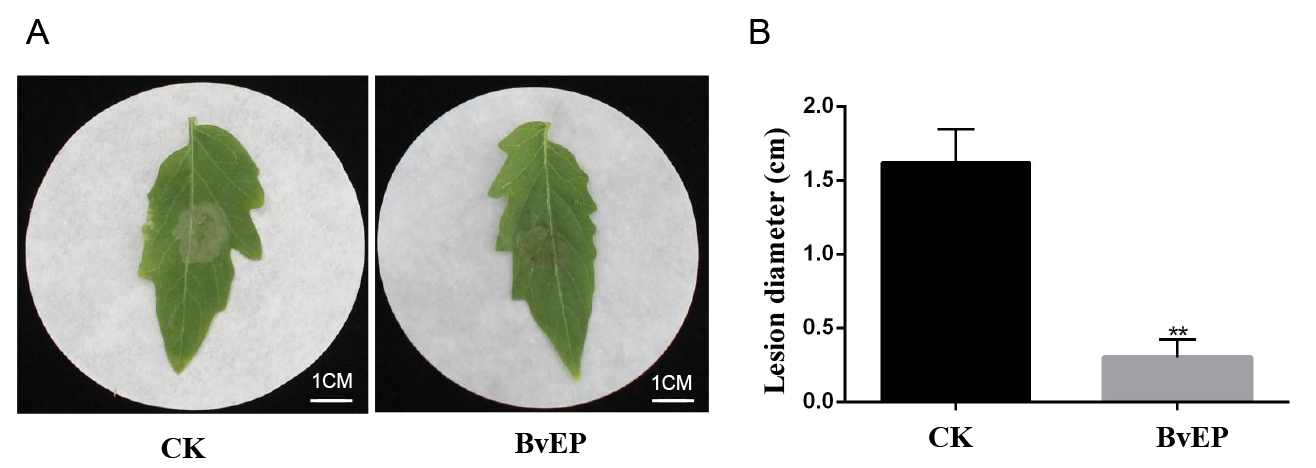


**Supplementary Figure 1.** Effects of purified BvEP on tomato leaves after inoculation with *B. cinerea*. (A) Phenotype of tomato systemic leaves inoculation at 3 DAI with *B.cinerea*; leaves were treated as follows before inoculation: CK represented Tris buffer infiltration, BvEP represented 50 μg·ml-1 purified BvEP infiltration; (B) Lesion diameter of tomato at 3 DAI with *B. cinerea*, asterisks indicate statistically significant differences (** *p* < 0.01).

## Supplementary Tables

**Supplementary Table 1: Primers for the identification of BvEP mRNA accumulation in tomato.**

| Primer ID | Sequence |
| --- | --- |
| BvEP-F | CTGTCGGAATCGGTGAAGCG |
| BvEP -R | GTAGTACGCAAGAGGGTGCTCC |

**Supplementary Table 2: Specific primers for qRT-PCR of BvEP overexpression in tomato.**

| Primer ID | Sequence | Reference | Description |
| --- | --- | --- | --- |
| *Pti5*-F | ATTCGCGATTCGGCTAGACATGGT | Liu et al., 2012 | Detection of tomato fruits and leaves |
| *Pti5*-R | AGTAGTGCCTTAGCACCTCGCATT | Liu et al., 2012 |
| *WRKY28*-F | ACAGATGCAGCTACCTCATCCTCA | Liu et al., 2012 |
| *WRKY28*-R | GTGCTCAAAGCCTCATGGTTCTTG | Liu et al., 2012 |
| *PR1a*-F | GGCAGGAACACCAAAGAAACCA | Zhang et al., 2020 |
| *PR1a*-R | TGGCCTCTGGTCAGGTTTAAAG | Zhang et al., 2020 |
| *NPR1*-F | GACTTCTTCGCTGATGCTAAGC | Sun et al., 2013 |
| *NPR1*-R | GACCACGGCATCAAAACTCACC | Sun et al., 2013 |
| *Actin*-F | CCAGGTATTGCTGATAGAATGAG | Zhang et al., 2020 |
| *Actin*-R | GAGCCTCCAATCCAGACAC | Zhang et al., 2020 |
| *UDP*-F | CCTGGATTGTTCGACAAGAT | Pombo et al., 2014 | Detection of tomato fruits |
| *UDP*-R | CTCCTCCGCTTTCTTCATTT | Pombo et al., 2014 |
| *UDP1*-F | TTGGACAGATCAAGGGACTAATG | Pombo et al., 2014 |
| *UDP1*-R | CACTCTCAACCACACCATCTT | Pombo et al., 2014 |
| *UDP*-F | CAAAGCTGAAAGAGGGAACG |  | Detection of tomato leaves |
| *UDP*-R | TAACCCAAGCCCTAGCTCAAC |  |
| *UDP1*-F | TTTGAAAGGGTCCCAAATCC |  |
| *UDP1*-R | TGCAGAGGGGTGTCAATTTC |  |
